# Supplementary material for: Lower rotational inertia and larger leg muscles indicate more rapid turns in tyrannosaurids than in other large theropods
Source: PeerJ. 2019 Feb 21;7:e6432. doi: 10.7717/peerj.6432 (PMC6387760; doi:10.7717/peerj.6432)
Supplement: Supplemental Information 1 — This spreadsheet includes all equations necessary for calculating mass properties from lateral and coronal reconstructions. Contact author Eric Snively (esnively@uwlax.edu) for instructions. [file peerj-07-6432-s001.xls]

## Sheet: Tarbosaurus_midsize
height(length), created by Plot Digitizer, 2.5.0 dev
Date: 2/24/11, 10:48:56 AM
63																			CM calculations: AP position				CM A-P position		CM calculations: D-V position					CM D-V position
Aggregate length	height dorsal	height ventral	dv semiaxis	right	left	ml semiaxis	Segment length	Segment volume	Segment mass	average dv axis	(average ml axis)^3	density	thickness	pi/4	Iy of frustrum	average ml axis	(average dv axis)^3	Ix of frustum	CM position: geometric centroid	CM position:Complex-Steiner's theorum	Segment mass	position*mass			CM position: geometric centroid	CM position:50%	Average centroid position	Segment mass	position*mass			a shorter	c taller-shorter	b taller	2ac+a^2+cb+ab+b^2	3*a+b	Frustum CM-D-V	Frustum mass	Mass*position
0	1.55833	1.44833	0.055	3.34278	3.27556	0.03361	0.134444	0.00423541	4.19306	0.135973	0.000303769	990	0.08901	0.785398	0.00285864	0.0672225	0.00251393	0.0116958		0.067222	4.19306	0.281866	2.85679			1.50333	1.50486	4.19306	6.30995	1.43317		0.11	0.32389	0.43389	0.459877	1.63167	0.281844	4.19306	1.18179	0.512398					1.50333	1.50486	4.19306	6.30995	1.43317
0.134444	1.72333	1.28944	0.216945	3.40389	3.20222	0.100835	0.128334	0.00964504	9.54859	0.23375	0.00107256	990	0.11869	0.785398	0.0231373	0.102363	0.0127719	0.120652		0.198611	9.54859	1.89645				1.50638	1.52625	9.54859	14.5735	0.797606		0.43389	0.06722	0.50111	0.748815	2.805	0.266957	9.54859	2.54907						1.50638	1.52625	9.54859	14.5735
0.262778	1.79667	1.29556	0.250555	3.40389	3.19611	0.10389	0.122222	0.0109432	10.8338	0.270415	0.00117149	990	0.21758	0.785398	0.0535936	0.105418	0.0197739	0.352654		0.323889	10.8338	3.50894				1.54611	1.56597	10.8338	16.9654			0.50111	0.07944	0.58055	1.0048	3.24498	0.309649	10.8338	3.35467						1.54611	1.56597	10.8338	16.9654
0.385	1.87611	1.29556	0.290275	3.41	3.19611	0.106945	0.140556	0.0155775	15.4217	0.311665	0.001445	990	0.21759	0.785398	0.0761941	0.113055	0.0302736	0.579052		0.455278	15.4217	7.02118				1.58583	1.61945	15.4217	24.9747			0.58055	0.08556	0.66611	1.32379	3.73998	0.353956	15.4217	5.45861						1.58583	1.61945	15.4217	24.9747
0.525556	1.98611	1.32	0.333055	3.41611	3.17778	0.119165	0.128333	0.0195827	19.3869	0.33611	0.00305731	990	0.21264	0.785398	0.169899	0.145138	0.0379703	0.911159		0.589723	19.3869	11.4329				1.65306	1.68056	19.3869	32.5808			0.66611	0.01222	0.67833	1.38025	4.03332	0.342211	19.3869	6.63441						1.65306	1.68056	19.3869	32.5808
0.653889	2.04722	1.36889	0.339165	3.465	3.12278	0.17111	0.128333	0.0278672	27.5886	0.348332	0.00783436	990	0.21264	0.785398	0.451198	0.19861	0.0422651	1.38788		0.718055	27.5886	19.8101				1.70805	1.72028	27.5886	47.46			0.67833	0.03667	0.715	1.53233	4.17999	0.366587	27.5886	10.1136						1.70805	1.72028	27.5886	47.46
0.782222	2.09	1.375	0.3575	3.53222	3.08	0.22611	0.134445	0.0369968	36.6268	0.36972	0.0132792	990	0.21264	0.785398	0.811737	0.236805	0.0505381	1.9787		0.849444	36.6268	31.1124				1.7325	1.76	36.6268	64.4632			0.715	0.04888	0.76388	1.74815	4.43664	0.394025	36.6268	14.4319						1.7325	1.76	36.6268	64.4632
0.916667	2.16944	1.40556	0.38194	3.54444	3.04944	0.2475	0.134443	0.0394421	39.0477	0.38958	0.0137998	990	0.21758	0.785398	0.909524	0.23986	0.0591276	2.39934		0.983888	39.0477	38.4186				1.7875	1.80736	39.0477	70.5733			0.76388	0.03056	0.79444	1.89247	4.67496	0.40481	39.0477	15.8069						1.7875	1.80736	39.0477	70.5733
1.05111	2.22444	1.43	0.39722	3.53222	3.06778	0.23222	0.14056	0.0377425	35.1006	0.394168	0.0102102	930	0.21759	0.785398	0.639627	0.216943	0.061241	2.11154		1.12139	35.1006	39.3614				1.82722	1.83333	35.1006	64.351			0.79444	-0.01221	0.78223	1.8934	4.73001	0.400296	35.1006	14.0506		0.79444	-0.01221	0.78223		1.82722	1.83333	35.1006	64.351
1.19167	2.23056	1.44833	0.391115	3.48333	3.08	0.201665	0.12833	0.0298819	27.7902	0.378893	0.00747837	930	0.2077	0.785398	0.429865	0.195555	0.0543936	1.61371		1.25584	27.7902	34.8999				1.83944	1.82417	27.7902	50.694			0.78223	-0.04889	0.73334	1.83565	4.54671	0.403732	27.7902	11.2198		0.78223	-0.04889	0.73334		1.83944	1.82417	27.7902	50.694
1.32	2.17556	1.44222	0.36667	3.465	3.08611	0.189445	0.12222	0.0266608	24.7945	0.363612	0.00696486	930	0.21264	0.785398	0.393341	0.190972	0.0480747	1.42595		1.38111	24.7945	34.2439				1.80889	1.76611	24.7945	43.7899			0.73334	-0.01223	0.72111	1.61336	4.36335	0.369753	24.7945	9.16785		0.73334	-0.01223	0.72111		1.80889	1.76611	24.7945	43.7899
1.44222	2.08389	1.36278	0.360555	3.45889	3.07389	0.1925	0.13445	0.0290126	26.9817	0.351387	0.00747865	930	0.21758	0.785398	0.417639	0.195557	0.0433869	1.34842		1.50944	26.9817	40.7274				1.72334	1.68056	26.9817	45.3443			0.72111	-0.03667	0.68444	1.56	4.21665	0.369962	26.9817	9.98219		0.72111	-0.03667	0.68444		1.72334	1.68056	26.9817	45.3443
1.57667	1.98	1.29556	0.34222	3.44667	3.04944	0.198615	0.14055	0.0352155	32.7504	0.386525	0.008774	930	0.2077	0.785398	0.514499	0.206253	0.0577474	1.80693		1.64695	32.7504	53.9381				1.63778	1.54764	32.7504	50.6858			0.68444	0.17722	0.86166	2.19597	4.6383	0.473442	32.7504	15.5054						1.63778	1.54764	32.7504	50.6858
1.71722	1.88833	1.02667	0.43083	3.45278	3.025	0.21389	0.12222	0.0451631	42.0017	0.441528	0.0191118	930	0.21264	0.785398	1.31062	0.267363	0.0860743	3.5743		1.77833	42.0017	74.6929				1.4575	1.43458	42.0017	60.2549			0.86166	0.04279	0.90445	2.45226	5.29833	0.462836	42.0017	19.4399						1.4575	1.43458	42.0017	60.2549
1.83944	1.86389	0.95944	0.452225	3.52	2.87833	0.320835	0.12834	0.0689163	51.1359	0.473612	0.0468731	742	0.21758	0.785398	2.81488	0.360558	0.106235	4.85687		1.90361	51.1359	97.3428				1.41166	1.39944	51.1359	71.5617			0.90445	0.08555	0.99	2.93298	5.68335	0.516066	51.1359	26.3895						1.41166	1.39944	51.1359	71.5617
1.96778	1.88222	0.89222	0.495	3.61778	2.81722	0.40028	0.13444	0.0904707	67.1293	0.513335	0.0725548	742	0.2077	0.785398	4.50814	0.417083	0.13527	6.82896		2.035	67.1293	136.608				1.38722	1.38111	67.1293	92.7129			0.99	0.07334	1.06334	3.3867	6.16002	0.549787	67.1293	36.9068						1.38722	1.38111	67.1293	92.7129
2.10222	1.90667	0.84333	0.53167	3.64833	2.78056	0.433885	0.13445	0.104745	77.7206	0.55	0.0915463	742	0.21759	0.785398	6.38464	0.450693	0.166375	9.50826		2.16945	77.7206	168.611				1.375	1.37194	77.7206	106.628			1.06334	0.07332	1.13666	3.87061	6.6	0.586456	77.7206	45.5798						1.375	1.37194	77.7206	106.628
2.23667	1.93722	0.80056	0.56833	3.67278	2.73778	0.4675	0.14055	0.125404	93.0496	0.579028	0.117948	742	0.21264	0.785398	8.46309	0.490415	0.194132	11.7978		2.30694	93.0496	214.66				1.36889	1.36736	93.0496	127.233			1.13666	0.04279	1.17945	4.17148	6.94833	0.600357	93.0496	55.863						1.36889	1.36736	93.0496	127.233
2.37722	1.95556	0.77611	0.589725	3.70944	2.68278	0.51333	0.12834	0.124794	92.5974	0.595835	0.140158	742	0.21264	0.785398	10.3486	0.519445	0.211533	13.6162		2.44139	92.5974	226.066				1.36583	1.36278	92.5974	126.19			1.17945	0.02444	1.20389	4.34746	7.15002	0.608034	92.5974	56.3024						1.36583	1.36278	92.5974	126.19
2.50556	1.96167	0.75778	0.601945	3.71556	2.66444	0.52556	0.13444	0.127967	94.9516	0.597363	0.130497	742	0.21758	0.785398	9.88445	0.507225	0.213164	13.7097		2.57278	94.9516	244.29				1.35973	1.36431	94.9516	129.543			1.18556	0.01833	1.20389	4.34772	7.16835	0.606516	94.9516	57.5896		1.20389	0.01833	1.18556		1.35973	1.36431	94.9516	129.543
2.64	1.96167	0.77611	0.59278	3.685	2.70722	0.48889	0.12833	0.109185	81.015	0.591253	0.0962829	742	0.21264	0.785398	7.05441	0.458335	0.20669	11.7393		2.70417	81.015	219.078				1.36889	1.36736	81.015	110.777			1.17945	0.00611	1.18556	4.21662	7.09503	0.594306	81.015	48.1477		1.18556	0.00611	1.17945		1.36889	1.36736	81.015	110.777
2.76833	1.95556	0.77611	0.589725	3.61778	2.76222	0.42778	0.14667	0.111868	83.0058	0.600418	0.0663625	742	0.21264	0.785398	4.93759	0.404863	0.216451	10.8594		2.84166	83.0058	235.875				1.36583	1.34597	83.0058	111.724			1.17945	0.04277	1.22222	4.47964	7.20501	0.621739	83.0058	51.608		1.17945	0.04277	1.22222		1.36583	1.34597	83.0058	111.724
2.915	1.93722	0.715	0.61111	3.58111	2.81722	0.381945	0.11611	0.0822739	61.0472	0.632498	0.0456907	742	0.21759	0.785398	3.66454	0.3575	0.253033	11.4706		2.97306	61.0472	181.497				1.32611	1.30778	61.0472	79.8362			1.22222	0.08555	1.30777	5.12347	7.58997	0.675031	61.0472	41.2088		1.22222	0.08555	1.30777		1.32611	1.30778	61.0472	79.8362
3.03111	1.94333	0.63556	0.653885	3.50778	2.84167	0.333055	0.14056	0.0862747	64.0158	0.661525	0.026037	742	0.21264	0.785398	2.1344	0.29639	0.289493	10.6326		3.10139	64.0158	198.538				1.28944	1.29709	64.0158	83.034			1.30777	0.03056	1.33833	5.37245	7.9383	0.676776	64.0158	43.3244		1.30777	0.03056	1.33833		1.28944	1.29709	64.0158	83.034
3.17167	1.97389	0.63556	0.669165	3.45278	2.93333	0.259725	0.12833	0.0631055	66.8919	0.656942	0.0135383	1060	0.2077	0.785398	1.53788	0.238335	0.283519	11.6843		3.23583	66.8919	216.451				1.30472	1.30472	66.8919	87.2753			1.28944	0.04889	1.33833	5.37099	7.88331	0.681312	66.8919	45.5742		1.33833	0.04889	1.28944		1.30472	1.30472	66.8919	87.2753
3.3	1.94944	0.66	0.64472	3.41	2.97611	0.216945	0.12833	0.0582779	61.7746	0.635555	0.0117959	1060	0.10384	0.785398	0.648104	0.227638	0.25672	5.052		3.36416	61.7746	207.82				1.30472	1.30777	61.7746	80.7872			1.25278	0.03666	1.28944	4.98662	7.62666	0.653841	61.7746	40.3907		1.28944	0.03666	1.25278		1.30472	1.30777	61.7746	80.7872
3.42833	1.93722	0.68444	0.62639	3.42833	2.95167	0.23833	0.12834	0.0577598	61.2254	0.605	0.0132788	1060	0.11374	0.785398	0.760717	0.236802	0.221445	4.96548		3.4925	61.2254	213.83				1.31083	1.32	61.2254	80.8176			1.16722	0.08556	1.25278	4.70105	7.26	0.647528	61.2254	39.6452		1.25278	0.08556	1.16722		1.31083	1.32	61.2254	80.8176
3.55667	1.91278	0.74556	0.58361	3.42222	2.95167	0.235275	0.14055	0.0557724	59.1187	0.554582	0.0117959	1060	0.10879	0.785398	0.592492	0.227637	0.170568	3.51663		3.62695	59.1187	214.42				1.32917	1.3307	59.1187	78.6691			1.05111	0.11611	1.16722	4.07373	6.65499	0.612131	59.1187	36.1884		1.16722	0.11611	1.05111		1.32917	1.3307	59.1187	78.6691
3.69722	1.85778	0.80667	0.525555	3.42222	2.98222	0.22	0.12222	0.0435821	46.1971	0.50264	0.01156	1060	0.1088	0.785398	0.526309	0.22611	0.12699	2.60085		3.75833	46.1971	173.624				1.33222	1.32764	46.1971	61.3331			0.95945	0.09166	1.05111	3.3061	6.03168	0.548122	46.1971	25.3216		1.05111	0.09166	0.95945		1.33222	1.32764	46.1971	61.3331
3.81944	1.80278	0.84333	0.479725	3.42222	2.95778	0.23222	0.13445	0.0491922	52.1437	0.465973	0.0157293	1060	0.21264	0.785398	1.29751	0.250555	0.101177	4.48771		3.88666	52.1437	202.665				1.32306	1.32764	52.1437	69.228			0.90444	0.05501	0.95945	2.75861	5.59167	0.493342	52.1437	25.7247		0.95945	0.05501	0.90444		1.32306	1.32764	52.1437	69.228
3.95389	1.78444	0.88	0.45222	3.47722	2.93944	0.26889	0.14055	0.0515977	54.6936	0.43236	0.0197744	1060	0.21264	0.785398	1.51353	0.270417	0.0808233	3.86912		4.02416	54.6936	220.096				1.33222	1.34597	54.6936	73.616			0.825	0.07944	0.90444	2.44772	5.18832	0.471776	54.6936	25.8031		0.90444	0.07944	0.825		1.33222	1.34597	54.6936	73.616
4.09444	1.77222	0.94722	0.4125	3.47111	2.92722	0.271945	0.11612	0.0367223	38.9256	0.385	0.0178307	1060	0.21264	0.785398	1.21526	0.26125	0.0570666	2.63924		4.1525	38.9256	161.639				1.35972	1.38111	38.9256	53.7605			0.715	0.11	0.825	2.02977	4.62	0.439345	38.9256	17.1018		0.825	0.11	0.715		1.35972	1.38111	38.9256	53.7605
4.21056	1.76	1.045	0.3575	3.45278	2.95167	0.250555	0.14055	0.03579	37.9374	0.33764	0.0138003	1060	0.21264	0.785398	0.824863	0.239863	0.0384912	1.63442		4.28083	37.9374	162.404				1.4025	1.41319	37.9374	53.6129			0.63556	0.07944	0.715	1.52736	4.05168	0.376971	37.9374	14.3013		0.715	0.07944	0.63556		1.4025	1.41319	37.9374	53.6129
4.35111	1.74167	1.10611	0.31778	3.44056	2.98222	0.22917	0.12833	0.0269827	28.6017	0.304028	0.010648	1060	0.21758	0.785398	0.586402	0.22	0.0281021	1.11989		4.41528	28.6017	126.284				1.42389	1.42236	28.6017	40.6819			0.58055	0.05501	0.63556	1.20878	3.64833	0.331325	28.6017	9.47645		0.63556	0.05501	0.58055		1.42389	1.42236	28.6017	40.6819
4.47944	1.71111	1.13056	0.290275	3.42833	3.00667	0.21083	0.12834	0.0227593	24.1249	0.284165	0.00783436	1060	0.2077	0.785398	0.384952	0.19861	0.0229463	0.788034		4.54361	24.1249	109.614				1.42083	1.42694	24.1249	34.4248			0.55611	0.02444	0.58055	1.01052	3.40998	0.296341	24.1249	7.14919		0.58055	0.02444	0.55611		1.42083	1.42694	24.1249	34.4248
4.60778	1.71111	1.155	0.278055	3.41	3.03722	0.18639	0.14055	0.0218348	23.1449	0.271945	0.00600921	1060	0.21759	0.785398	0.296028	0.181805	0.0201114	0.662344		4.67806	23.1449	108.273				1.43305	1.43611	23.1449	33.2386			0.53167	0.02444	0.55611	0.927178	3.26334	0.284119	23.1449	6.57591		0.55611	0.02444	0.53167		1.43305	1.43611	23.1449	33.2386
4.74833	1.705	1.17333	0.265835	3.41	3.05556	0.17722	0.13445	0.0182728	19.3692	0.259723	0.00461804	1060	0.21758	0.785398	0.217261	0.166528	0.0175198	0.528481		4.81555	19.3692	93.2733				1.43917	1.45139	19.3692	28.1122			0.50722	0.02445	0.53167	0.847421	3.11667	0.2719	19.3692	5.26647		0.53167	0.02445	0.50722		1.43917	1.45139	19.3692	28.1122
4.88278	1.71722	1.21	0.25361	3.38556	3.07389	0.155835	0.12222	0.0146103	15.4869	0.249028	0.00356615	1060	0.21264	0.785398	0.157213	0.15278	0.0154434	0.417685		4.94389	15.4869	76.5656				1.46361	1.47125	15.4869	22.7851			0.48889	0.01833	0.50722	0.77148	2.98833	0.258164	15.4869	3.99817		0.50722	0.01833	0.48889		1.46361	1.47125	15.4869	22.7851
5.005	1.72333	1.23444	0.244445	3.39167	3.09222	0.149725	0.13444	0.0143699	15.2321	0.236805	0.00296194	1060	0.21264	0.785398	0.124168	0.143613	0.0132792	0.337602		5.07222	15.2321	77.2603				1.47889	1.48652	15.2321	22.6428			0.45833	0.03056	0.48889	0.716106	2.84166	0.252003	15.2321	3.83852		0.48889	0.03056	0.45833		1.47889	1.48652	15.2321	22.6428
5.13944	1.72333	1.265	0.229165	3.37944	3.10444	0.1375	0.14056	0.0125098	13.2604	0.215415	0.0022681	1060	0.2077	0.785398	0.0844832	0.131388	0.00999604	0.227098		5.20972	13.2604	69.0828				1.49416	1.50792	13.2604	19.9955			0.40333	0.055	0.45833	0.627174	2.58498	0.242622	13.2604	3.21726		0.45833	0.055	0.40333		1.49416	1.50792	13.2604	19.9955
5.28	1.72333	1.32	0.201665	3.36722	3.11667	0.125275	0.13444	0.00995022	10.5472	0.203195	0.00156534	1060	0.21758	0.785398	0.0576151	0.11611	0.00838956	0.176451		5.34722	10.5472	56.3984				1.52167	1.53236	10.5472	16.1622			0.40333	0.00612	0.40945	0.50291	2.43834	0.206251	10.5472	2.17538		0.40333	0.00612	0.40945		1.52167	1.53236	10.5472	16.1622
5.41444	1.74778	1.33833	0.204725	3.34278	3.12889	0.106945	0.11612	0.0072513	7.68638	0.19403	0.00107256	1060	0.21759	0.785398	0.0376987	0.102363	0.00730477	0.135451		5.4725	7.68638	42.0637				1.54305	1.55986	7.68638	11.9897			0.36667	0.04278	0.40945	0.501118	2.32836	0.215223	7.68638	1.65429		0.40945	0.04278	0.36667		1.54305	1.55986	7.68638	11.9897
5.53056	1.76	1.39333	0.183335	3.33056	3.135	0.09778	0.14666	0.00741375	7.85857	0.181808	0.000695801	1060	0.2077	0.785398	0.021874	0.0886125	0.00600946	0.0920794		5.60389	7.85857	44.0386				1.57666	1.59347	7.85857	12.5224			0.36056	0.00611	0.36667	0.403303	2.18169	0.184858	7.85857	1.45272		0.36667	0.00611	0.36056		1.57666	1.59347	7.85857	12.5224
5.67722	1.79056	1.43	0.18028	3.31833	3.15944	0.079445	0.12222	0.00521166	5.52436	0.174168	0.000473048	1060	0.21758	0.785398	0.0149241	0.0779175	0.00528325	0.0745678		5.73833	5.52436	31.7006				1.61028	1.63472	5.52436	9.0308			0.33611	0.02445	0.36056	0.389413	2.09001	0.186321	5.52436	1.02931		0.36056	0.02445	0.33611		1.61028	1.63472	5.52436	9.0308
5.79944	1.82722	1.49111	0.168055	3.30611	3.15333	0.07639	0.12834	0.00451906	4.7902	0.155833	0.000370262	1060	0.21264	0.785398	0.0102143	0.0718075	0.0037842	0.0481044		5.86361	4.7902	28.0879				1.65917	1.6775	4.7902	8.03556			0.28722	0.04889	0.33611	0.33652	1.86999	0.179958	4.7902	0.862035		0.33611	0.04889	0.28722		1.65917	1.6775	4.7902	8.03556
5.92778	1.83944	1.55222	0.14361	3.28778	3.15333	0.067225	0.14666	0.00443737	4.70362	0.146665	0.000283561	1060	0.2077	0.785398	0.00719126	0.0656975	0.00315486	0.0358394		6.00111	4.70362	28.2269				1.69583	1.71722	4.70362	8.07714			0.29944	-0.01222	0.28722	0.268993	1.75998	0.152839	4.70362	0.718894		0.28722	-0.01222	0.29944		1.69583	1.71722	4.70362	8.07714
6.07444	1.88833	1.58889	0.14972	3.28167	3.15333	0.06417	0.12834	0.00341776	3.62282	0.14208	0.000211549	1060	0.21758	0.785398	0.00544451	0.059585	0.00286813	0.0309564		6.13861	3.62282	22.2391				1.73861	1.7493	3.62282	6.33742			0.26888	0.03056	0.29944	0.268059	1.70496	0.157223	3.62282	0.569591		0.29944	0.03056	0.26888		1.73861	1.7493	3.62282	6.33742
6.20278	1.89444	1.62556	0.13444	3.26333	3.15333	0.055	0.12833	0.0029131	3.08789	0.131387	0.000166375	1060	0.21759	0.785398	0.00395983	0.055	0.0022681	0.0225975		6.26694	3.08789	19.3516				1.76	1.77528	3.08789	5.48186			0.25667	0.01221	0.26888	0.21674	1.57665	0.137469	3.08789	0.424488		0.26888	0.01221	0.25667		1.76	1.77528	3.08789	5.48186
6.33111	1.91889	1.66222	0.128335	3.26333	3.15333	0.055	0.13445	0.00280203	2.97015	0.120695	0.000166375	1060	0.20769	0.785398	0.00347207	0.055	0.0017582	0.0167202		6.39833	2.97015	19.004				1.79055	1.79514	2.97015	5.33183			0.22611	0.03056	0.25667	0.196705	1.44834	0.135814	2.97015	0.403387		0.25667	0.03056	0.22611		1.79055	1.79514	2.97015	5.33183
6.46556	1.91278	1.68667	0.113055	3.25722	3.14722	0.055	0.12833	0.00237201	2.51433	0.11	0.000152894	1060	0.21759	0.785398	0.00304662	0.0534725	0.001331	0.0128927		6.52973	2.51433	16.4179				1.79973	1.80889	2.51433	4.54814			0.21389	0.01222	0.22611	0.153228	1.32	0.116082	2.51433	0.291867		0.22611	0.01222	0.21389		1.79973	1.80889	2.51433	4.54814
6.59389	1.925	1.71111	0.106945	3.245	3.14111	0.051945	0.13444	0.00208265	2.20761	0.0977775	0.000128157	1060	0.21264	0.785398	0.00221832	0.0504175	0.000934796	0.00834332		6.66111	2.20761	14.7052				1.81805	1.82111	2.20761	4.02031			0.17722	0.03667	0.21389	0.135902	1.17333	0.115826	2.20761	0.255699		0.21389	0.03667	0.17722		1.81805	1.82111	2.20761	4.02031
6.72833	1.91278	1.73556	0.08861	3.23889	3.14111	0.04889	0.14056	0.00173263	1.83659	0.085555	9.62766e-05	1060	0.21759	0.785398	0.00149211	0.0458325	0.000626233	0.00519929		6.79861	1.83659	12.4862				1.82417	1.81805	1.83659	3.33902			0.165	0.01222	0.17722	0.0940715	1.02666	0.0916286	1.83659	0.168284		0.17722	0.01222	0.165		1.82417	1.81805	1.83659	3.33902
6.86889	1.89444	1.72944	0.0825	3.21444	3.12889	0.042775	0.12222	0.00127899	1.35573	0.0779175	7.82654e-05	1060	0.20769	0.785398	0.00105443	0.042775	0.000473048	0.0034987		6.93	1.35573	9.39519				1.81194	1.80736	1.35573	2.45028			0.14667	0.01833	0.165	0.081339	0.93501	0.0869927	1.35573	0.117938		0.165	0.01833	0.14667		1.81194	1.80736	1.35573	2.45028
6.99111	1.87611	1.72944	0.073335	3.21444	3.12889	0.042775	0.13445	0.00134265	1.42321	0.071805	8.6953e-05	1060	0.21264	0.785398	0.0011053	0.0443025	0.000370224	0.00290357		7.05833	1.42321	10.0455				1.80278	1.78597	1.42321	2.5418			0.14055	0.00612	0.14667	0.0644988	0.86166	0.0748541	1.42321	0.106533		0.14667	0.00612	0.14055		1.80278	1.78597	1.42321	2.5418
7.12556	1.83944	1.69889	0.070275	3.20222	3.11056	0.04583	0.12833	0.00108293	1.1479	0.0626375	7.82792e-05	1060	0.21759	0.785398	0.000888209	0.0427775	0.000245756	0.00190438		7.18973	1.1479	8.2531				1.76917	1.7493	1.1479	2.00803			0.11	0.03055	0.14055	0.0583296	0.75165	0.0776021	1.1479	0.0890796		0.14055	0.03055	0.11		1.76917	1.7493	1.1479	2.00803
7.25389	1.78444	1.67444	0.055	3.18389	3.10444	0.039725	0.14055	0.000842365	0.892907	0.051945	4.93097e-05	1060	0.21264	0.785398	0.000453437	0.03667	0.000140162	0.000909877		7.32417	0.892907	6.5398				1.72944	1.71111	0.892907	1.52786			0.09778	0.01222	0.11	0.0361507	0.62334	0.0579951	0.892907	0.0517843		0.11	0.01222	0.09778		1.72944	1.71111	0.892907	1.52786
7.39444	1.74167	1.64389	0.04889	3.16556	3.09833	0.033615	0.12223	0.000491313	0.520792	0.038535	3.79839e-05	1060	0.21264	0.785398	0.000259117	0.033615	5.72224e-05	0.000340518		7.45556	0.520792	3.8828				1.69278	1.6977	0.520792	0.884149			0.05636	0.04142	0.09778	0.0269672	0.46242	0.0583175	0.520792	0.0303713		0.09778	0.04142	0.05636		1.69278	1.6977	0.520792	0.884149
7.51667	1.7308	1.67444	0.02818	3.17167	3.10444	0.033615	0.14055	0.000306457	0.324844	0.023675	2.44648e-05	1060	0.21264	0.785398	0.000102535	0.02903	1.327e-05	6.81958e-05		7.58695	0.324844	2.46458				1.70262	1.66756	0.324844	0.541697			0.03834	0.01802	0.05636	0.00920463	0.2841	0.0323993	0.324844	0.0105247		0.05636	0.01802	0.03834		1.70262	1.66756	0.324844	0.541697
7.65722	1.65167	1.61333	0.01917	3.16556	3.11667	0.024445	0.12222	0.000115415	0.12234	0.0124875	1.75203e-05	1060	0.21759	0.785398	3.96325e-05	0.0259725	1.94727e-06	9.16168e-06		7.71833	0.12234	0.944257				1.6325	1.59221	0.12234	0.19479			0.01161	0.02673	0.03834	0.00369537	0.14985	0.0246605	0.12234	0.00301695		0.03834	0.02673	0.01161		1.6325	1.59221	0.12234	0.19479
7.77944	1.55772	1.54611	0.005805	3.16556	3.11056	0.0275				0.0029025	2.59961e-06	1060	0.21264	0.785398	1.33574e-06	0.01375	2.44521e-08	5.95196e-08		3.88972	4.08849	15.9031				1.55192																			1.55192	1.55192
											Axial mass k=2	1799
								2.04257	1799		Axial mass k=2.3	1883.55
								2.13857	1883.55		Mass with legs	2250.55
			Anteroposterior center of mass
			H=A8-A7	R1^2	2*R1*R2	3*R2^2	R1^2	R1*R2	R2^2	Frustum CM position from left	Frustum CM from tip of rostrum	Segment mass	Segment position*mass	CM from tip of rostrum
			0.134444	0.003025	0.023864	0.141195	0.003025	0.011932	0.0470651	0.0910882	0.0910882	4.19306	0.381938	2.84792		-0.00886792
			0.128334	0.0470651	0.108713	0.188333	0.0470651	0.0543567	0.0627778	0.0672372	0.201681	9.54859	1.92577
			0.122222	0.0627778	0.14546	0.252779	0.0627778	0.0727299	0.0842596	0.0640977	0.326876	10.8338	3.5413
			0.140556	0.0842596	0.193355	0.332777	0.0842596	0.0966775	0.110926	0.0734885	0.458488	15.4217	7.07069
			0.128333	0.110926	0.225921	0.345099	0.110926	0.112961	0.115033	0.0645553	0.590111	19.3869	11.4404
			0.128333	0.115033	0.242503	0.383419	0.115033	0.121251	0.127806	0.0652921	0.719181	27.5886	19.8412
			0.134445	0.127806	0.273087	0.437634	0.127806	0.136544	0.145878	0.0687032	0.850925	36.6268	31.1667
			0.134443	0.145878	0.303428	0.473351	0.145878	0.151714	0.157784	0.0681002	0.984767	39.0477	38.4529
			0.14056	0.157784	0.310717	0.458913	0.157784	0.155359	0.152971	0.0699172	1.12103	35.1006	39.3487
			0.12833	0.152971	0.28682	0.403341	0.152971	0.14341	0.134447	0.0627856	1.25446	27.7902	34.8616
			0.12222	0.134447	0.264409	0.39	0.134447	0.132205	0.13	0.0607674	1.38077	24.7945	34.2354
			0.13445	0.13	0.246778	0.351344	0.13	0.123389	0.117115	0.066056	1.50828	26.9817	40.6958
			0.14055	0.117115	0.294877	0.556843	0.117115	0.147439	0.185614	0.0756217	1.65229	32.7504	54.1132
			0.12222	0.185614	0.389664	0.613522	0.185614	0.194832	0.204507	0.0620969	1.77932	42.0017	74.7344
			0.12834	0.204507	0.447703	0.735075	0.204507	0.223851	0.245025	0.0661006	1.90554	51.1359	97.4415
			0.13444	0.245025	0.526353	0.848019	0.245025	0.263177	0.282673	0.0688199	2.0366	67.1293	136.715
			0.13445	0.282673	0.604328	0.968997	0.282673	0.302164	0.322999	0.0687181	2.17094	77.7206	168.727
			0.14055	0.322999	0.670317	1.04333	0.322999	0.335158	0.347776	0.0711405	2.30781	93.0496	214.741
			0.12834	0.347776	0.709964	1.08701	0.347776	0.354982	0.362338	0.0646087	2.44183	92.5974	226.107
			0.13444	0.362338	0.713642	1.05416	0.362338	0.356821	0.351388	0.0668762	2.57244	94.9516	244.257
			0.12833	0.351388	0.699154	1.04333	0.351388	0.349577	0.347776	0.0640545	2.70405	81.015	219.069
			0.14667	0.347776	0.720774	1.12037	0.347776	0.360387	0.373455	0.0742056	2.84254	83.0058	235.947
			0.11611	0.373455	0.799191	1.2827	0.373455	0.399596	0.427566	0.0593632	2.97436	61.0472	181.577
			0.14056	0.427566	0.875114	1.34335	0.427566	0.437557	0.447782	0.0708211	3.10193	64.0158	198.573
			0.12833	0.447782	0.862848	1.24699	0.447782	0.431424	0.415664	0.0633692	3.23504	66.8919	216.398
			0.12833	0.415664	0.807692	1.17709	0.415664	0.403846	0.392364	0.0635482	3.36355	61.7746	207.782
			0.12834	0.392364	0.731135	1.0218	0.392364	0.365567	0.340601	0.0626581	3.49099	61.2254	213.737
			0.14055	0.340601	0.613438	0.828624	0.340601	0.306719	0.276208	0.0678251	3.6245	59.1187	214.276
			0.12222	0.276208	0.504244	0.690408	0.276208	0.252122	0.230136	0.059254	3.75647	46.1971	173.538
			0.13445	0.230136	0.433882	0.613509	0.230136	0.216941	0.204503	0.0659027	3.88534	52.1437	202.596
			0.14055	0.204503	0.373082	0.510469	0.204503	0.186541	0.170156	0.0681245	4.02201	54.6936	219.978
			0.11612	0.170156	0.294938	0.383419	0.170156	0.147469	0.127806	0.0552999	4.14974	38.9256	161.531
			0.14055	0.127806	0.227213	0.302952	0.127806	0.113606	0.100984	0.0675225	4.27808	37.9374	162.299
			0.12833	0.100984	0.184487	0.252779	0.100984	0.0922436	0.0842596	0.0622313	4.41334	28.6017	126.229
			0.12834	0.0842596	0.161425	0.231944	0.0842596	0.0807124	0.0773146	0.0632503	4.54269	24.1249	109.592
			0.14055	0.0773146	0.147834	0.212005	0.0773146	0.0739168	0.0706682	0.0692226	4.677	23.1449	108.249
			0.13445	0.0706682	0.134837	0.192954	0.0706682	0.0674184	0.064318	0.0661704	4.8145	19.3692	93.2528
			0.12222	0.064318	0.123987	0.17926	0.064318	0.0619937	0.0597534	0.0603604	4.94314	15.4869	76.554
			0.13444	0.0597534	0.112036	0.15755	0.0597534	0.0560182	0.0525166	0.0657747	5.07077	15.2321	77.2383
			0.14056	0.0525166	0.0924291	0.122006	0.0525166	0.0462146	0.0406688	0.0672934	5.20673	13.2604	69.0432
			0.13444	0.0406688	0.0825717	0.125737	0.0406688	0.0412859	0.0419123	0.0675574	5.34756	10.5472	56.4019
			0.11612	0.0419123	0.0750665	0.100835	0.0419123	0.0375333	0.0336117	0.0559286	5.47037	7.68638	42.0473
			0.14666	0.0336117	0.0661033	0.0975026	0.0336117	0.0330516	0.0325009	0.0729193	5.60348	7.85857	44.0353
			0.12222	0.0325009	0.0605939	0.0847274	0.0325009	0.030297	0.0282425	0.0596808	5.7369	5.52436	31.6927
			0.12834	0.0282425	0.0482688	0.0618715	0.0282425	0.0241344	0.0206238	0.0608215	5.86026	4.7902	28.0719
			0.14666	0.0206238	0.0430026	0.0672482	0.0206238	0.0215013	0.0224161	0.0743482	6.00213	4.70362	28.2317
			0.12834	0.0224161	0.0402567	0.0542223	0.0224161	0.0201284	0.0180741	0.0618718	6.13631	3.62282	22.2308
			0.12833	0.0180741	0.0345067	0.0494096	0.0180741	0.0172534	0.0164699	0.0631714	6.26595	3.08789	19.3486
			0.13445	0.0164699	0.0290178	0.0383443	0.0164699	0.0145089	0.0127814	0.0643919	6.3955	2.97015	18.9956
			0.12833	0.0127814	0.0241813	0.0343117	0.0127814	0.0120907	0.0114372	0.0629773	6.52854	2.51433	16.4149
			0.13444	0.0114372	0.0189528	0.0235552	0.0114372	0.0094764	0.00785173	0.0630306	6.65692	2.20761	14.6959
			0.14056	0.00785173	0.0146206	0.0204187	0.00785173	0.00731032	0.00680625	0.0686077	6.79694	1.83659	12.4832
			0.12222	0.00680625	0.0121003	0.0161341	0.00680625	0.00605014	0.00537802	0.0587168	6.92761	1.35573	9.39195
			0.13445	0.00537802	0.0103072	0.0148157	0.00537802	0.00515362	0.00493858	0.0662702	7.05738	1.42321	10.0441
			0.12833	0.00493858	0.00773025	0.009075	0.00493858	0.00386513	0.003025	0.0589749	7.18453	1.1479	8.24715
			0.14055	0.003025	0.0053779	0.0071707	0.003025	0.00268895	0.00239023	0.0675228	7.32141	0.892907	6.53734
			0.12223	0.00239023	0.00275544	0.00238234	0.00239023	0.00137772	0.000794112	0.0504239	7.44486	0.520792	3.87723
			0.14055	0.000794112	0.00108042	0.00110247	0.000794112	0.000540211	0.000367489	0.0614665	7.57814	0.324844	2.46171
			0.12222	0.000367489	0.000222564	0.000101094	0.000367489	0.000111282	3.3698e-05	0.0412083	7.69843	0.12234	0.941822
												1.32581	0
Leg
0.12833	-0.87389	-0.92889	0.0275			0.082715	0.13445	0.00387185	4.10416
0.26278	-0.715	-1.16722	0.22611			0.082715	0.12833	0.00902534	9.56686
0.39111	-0.54389	-1.17944	0.317775			0.082715	0.12833	0.0112528	11.928
0.51944	-0.46444	-1.17944	0.3575			0.082715	0.13445	0.0131781	13.9688
0.65389	-0.39111	-1.18556	0.397225			0.082715	0.14055	0.0155013	16.4314
0.79444	-0.28722	-1.19167	0.452225			0.082715	0.11612	0.0136457	14.4644
0.91056	-0.28722	-1.19167	0.452225			0.082715	0.14055	0.0157289	16.6726
1.05111	-0.39722	-1.21611	0.409445			0.082715	0.13445	0.0137138	14.5366
1.18556	-0.46444	-1.21611	0.375835			0.082715	0.13444	0.0125923	13.3478
1.32	-0.53778	-1.22833	0.345275			0.082715	0.13444	0.0113068	11.9852
1.45444	-0.62333	-1.22833	0.3025			0.082715	0.12223	0.00892015	9.45536
1.57667	-0.68444	-1.20389	0.259725			0.082715	0.13444	0.00891287	9.44764
1.71111	-0.64167	-1.14278	0.250555			0.082715	0.12833	0.00773588	8.20003
1.83944	-0.63556	-1.06333	0.213885			0.082715	0.12834	0.00603149	6.39338
1.96778	-0.62944	-0.92889	0.149725			0.082715	0.12833	0.00425969	4.51527
2.09611	-0.54389	-0.75778	0.106945			0.082715	0.14667	0.00372114	3.94441
2.24278	-0.50111	-0.67833	0.08861			0.082715	0.13444	0.00330685	3.50526
2.37722	-0.45833	-0.66	0.100835			0.082715	0.13445	0.00346944	3.67761
2.51167	-0.46444	-0.66	0.09778			0.082715	0.12222	0.00295865	3.13617
2.63389	-0.47056	-0.64778	0.08861			0.082715	0.13444	0.00341086	3.61551
2.76833	-0.47667	-0.69056	0.106945			0.082715	0.06111	0.00056609	0.600055
2.82944	-0.47667	-0.69056	0.106945
									183.497

## Sheet: Iy and Ix calculations
Segment from acetablulum	Segment length	Distance	Distance squared	Segment volume	Segment mass	RI (mass*distance^2	Iy of frustum	Ix of frustum			Skull mass				Skull RI	Mass at k=2.3	Iy at k=2.3	Frustum Iy k=2.3	Frustum Ix at k=2.3
23	0.08901	2.76789	7.66122	0.00350637	4.19306	32.1239	0.00285864	0.0116958			3.50637	0.08901	1.49837	2.24511	7.8722	4.39223	33.6498	0.00315479	0.0129075
22	0.11869	2.6573	7.06123	0.0144119	9.54859	67.4248	0.0231373	0.120652			14.4119	0.11869	1.40936	1.9863	28.6263	10.0021	70.6275	0.0255344	0.133152
21	0.21758	2.5321	6.41155	0.0396968	10.8338	69.4613	0.0535936	0.352654			39.6968	0.21758	1.29067	1.66583	66.128	11.3484	72.7607	0.0591459	0.389189
20	0.21759	2.40049	5.76235	0.0487013	15.4217	88.8655	0.0761941	0.579052			48.7013	0.21759	1.07309	1.15152	56.0807	16.1543	93.0866	0.0840878	0.639042
19	0.21264	2.26887	5.14776	0.0587511	19.3869	99.7992	0.169899	0.911159			58.7511	0.21264	0.8555	0.73188	42.9987	20.3078	104.54	0.1875	1.00555
18	0.21264	2.1398	4.57873	0.0751856	27.5886	126.321	0.451198	1.38788			75.1856	0.21264	0.64286	0.413269	31.0719	28.899	132.321	0.497942	1.53167
17	0.21264	2.00805	4.03228	0.088426	36.6268	147.689	0.811737	1.9787			88.426	0.21264	0.43022	0.185089	16.3667	38.3666	154.705	0.895833	2.18369
16	0.21758	1.87421	3.51267	0.0935021	39.0477	137.162	0.909524	2.39934			93.5021	0.21758	0.21758	0.0473411	4.42649	40.9025	143.677	1.00375	2.64791
15	0.21759	1.73795	3.02048	0.0862192	35.1006	106.02	0.639627	2.11154			422.181		0		253.571	36.7678	111.056	0.705892	2.33029
14	0.2077	1.60452	2.5745	0.07315	27.7902	71.5457	0.429865	1.61371								29.1102	74.9442	0.474399	1.78089
13	0.21264	1.47821	2.18511	0.0704306	24.7945	54.1787	0.393341	1.42595								25.9722	56.7522	0.434091	1.57368
12	0.21758	1.3507	1.8244	0.0748032	26.9817	49.2254	0.417639	1.34842								28.2633	51.5636	0.460907	1.48812
11	0.2077	1.20669	1.45609	0.078508	32.7504	47.6877	0.514499	1.80693								34.306	49.9528	0.567801	1.99413
10	0.21264	1.07966	1.16567	0.120324	42.0017	48.9601	1.31062	3.5743								43.9968	51.2857	1.4464	3.9446
9	0.21758	0.953438	0.909045	0.206955	51.1359	46.4848	2.81488	4.85687								53.5648	48.6928	3.1065	5.36005
8	0.2077	0.822379	0.676307	0.268738	67.1293	45.4	4.50814	6.82896								70.3179	47.5565	4.97518	7.53645
7	0.21759	0.688041	0.4734	0.331139	77.7206	36.793	6.38464	9.50826								81.4124	38.5406	7.04609	10.4933
6	0.21264	0.551168	0.303787	0.369625	93.0496	28.2672	8.46309	11.7978								97.4695	29.6099	9.33987	13.02
5	0.21264	0.41715	0.174014	0.398114	92.5974	16.1133	10.3486	13.6162								96.9957	16.8786	11.4208	15.0269
4	0.21758	0.286543	0.0821067	0.403014	94.9516	7.79616	9.88445	13.7097								99.4618	8.16648	10.9085	15.13
3	0.21264	0.154924	0.0240016	0.369188	81.015	1.94449	7.05441	11.7393								84.8632	2.03685	7.78525	12.9554
2	0.21264	0.0164433	0.000270383	0.341434	83.0058	0.0224434	4.93759	10.8594								86.9486	0.0235095	5.44912	11.9844
1	0.21759	0.115384	0.0133135	0.322776	61.0472	0.812755	3.66454	11.4706								63.947	0.851361	4.04419	12.6589
0	0.21264	0.242952	0.0590258	0.257084	64.0158	3.77858	2.1344	10.6326								67.0566	3.95807	2.35552	11.7342
1	0.2077	0.37606	0.141421	0.199883	66.8919	9.45994	1.53788	11.6843								70.0692	9.90929	1.69721	12.8948
2	0.10384	0.504569	0.25459	0.10136	61.7746	15.7272	0.648104	5.052								64.7089	16.4742	0.715248	5.57539
3	0.11374	0.632009	0.399436	0.116451	61.2254	24.4556	0.760717	4.96548								64.1336	25.6173	0.839527	5.47991
4	0	0.765516	0.586015	0	59.1187	34.6445	0.592492	3.51663								61.9269	36.2901	0.653874	3.88096
5	0.10879	0.897495	0.805497	0.104631	46.1971	37.2116	0.526309	2.60085								48.3914	38.9792	0.580835	2.8703
6	0.1088	1.02636	1.05342	0.090217	52.1437	54.9294	1.29751	4.48771								54.6206	57.5385	1.43193	4.95264
7	0.21264	1.16304	1.35265	0.158296	54.6936	73.9814	1.51353	3.86912								57.2916	77.4955	1.67033	4.26996
8	0.21264	1.29076	1.66606	0.15612	38.9256	64.8526	1.21526	2.63924								40.7746	67.9331	1.34116	2.91267
9	0.21264	1.4191	2.01385	0.173382	37.9374	76.4004	0.824863	1.63442								39.7394	80.0294	0.910318	1.80375
10	0.21264	1.55436	2.41604	0.174939	28.6017	69.1029	0.586402	1.11989								29.9602	72.3852	0.647154	1.23591
11	0.21758	1.68371	2.83488	0.147458	24.1249	68.3912	0.384952	0.788034								25.2708	71.6398	0.424833	0.869675
12	0.2077	1.81802	3.30521	0.11872	23.1449	76.4987	0.296028	0.662344								24.2443	80.1324	0.326697	0.730963
13	0.21759	1.95552	3.82406	0.104105	19.3692	74.0689	0.217261	0.528481								20.2892	77.5872	0.239769	0.583232
14	0.21758	2.08416	4.34373	0.0865771	15.4869	67.271	0.157213	0.417685								16.2225	70.4663	0.1735	0.460957
15	0.21264	2.2118	4.89204	0.0730078	15.2321	74.5158	0.124168	0.337602								15.9556	78.0553	0.137031	0.372578
16	0.21264	2.34775	5.51195	0.0641552	13.2604	73.0905	0.0844832	0.227098								13.8902	76.5623	0.0932357	0.250626
17	0.2077	2.48858	6.19302	0.0549041	10.5472	65.3193	0.0576151	0.176451								11.0482	68.4219	0.0635841	0.194731
18	0.21758	2.61139	6.81936	0.0522882	7.68638	52.4162	0.0376987	0.135451								8.05148	54.9059	0.0416043	0.149484
19	0.21759	2.7445	7.53228	0.0479128	7.85857	59.193	0.021874	0.0920794								8.23185	62.0046	0.0241402	0.101619
20	0.2077	2.87792	8.28243	0.0409849	5.52436	45.7552	0.0149241	0.0745678								5.78677	47.9286	0.0164702	0.082293
21	0.21758	3.00128	9.0077	0.0369744	4.7902	43.1487	0.0102143	0.0481044								5.01774	45.1983	0.0112725	0.053088
22	0.21264	3.14315	9.87939	0.0296669	4.70362	46.4688	0.00719126	0.0358394								4.92704	48.6761	0.00793628	0.0395523
23	0.2077	3.27733	10.7409	0.0245841	3.62282	38.9124	0.00544451	0.0309564								3.79491	40.7608	0.00600856	0.0341635
24	0.21758	3.40697	11.6075	0.0216503	3.08789	35.8425	0.00395983	0.0225975								3.23456	37.5451	0.00437007	0.0249386
25	0.21759	3.53652	12.507	0.0174652	2.97015	37.1476	0.00347207	0.0167202								3.11123	38.9121	0.00383178	0.0184524
26	0.20769	3.66956	13.4657	0.0132189	2.51433	33.8571	0.00304662	0.0128927								2.63376	35.4653	0.00336225	0.0142284
27	0.21759	3.79794	14.4244	0.0132826	2.20761	31.8434	0.00221832	0.00834332								2.31247	33.356	0.00244813	0.00920769
28	0.21264	3.93796	15.5075	0.0129639	1.83659	28.4809	0.00149211	0.00519929								1.92382	29.8337	0.00164669	0.00573794
29	0.21759	4.06863	16.5537	0.0122864	1.35573	22.4423	0.00105443	0.0034987								1.42012	23.5084	0.00116367	0.00386116
30	0.20769	4.1984	17.6266	0.0110731	1.42321	25.0862	0.0011053	0.00290357								1.49081	26.2778	0.00121981	0.00320439
31	0.21264	4.32556	18.7104	0.0102907	1.1479	21.4778	0.000888209	0.00190438								1.20243	22.498	0.000980228	0.00210167
32	0.21759	4.46243	19.9133	0.00992841	0.892907	17.7807	0.000453437	0.000909877								0.93532	18.6253	0.000500413	0.00100414
33	0.21264	4.58589	21.0303	0.00857979	0.520792	10.9524	0.000259117	0.000340518								0.54553	11.4727	0.000285961	0.000375796
34	0.21264	4.71916	22.2704	0.00721365	0.324844	7.23443	0.000102535	6.81958e-05								0.340274	7.57806	0.000113158	7.52609e-05
35	0.21264	4.83945	23.4203	0.00608048	0.12234	2.86523	3.96325e-05	9.16168e-06								0.128151	3.00132	4.37384e-05	1.01108e-05
36	0.21759	7.41157	54.9313	0.00513234		0	0.00556685	0.00787834								0	0	0.00614358	0.00869453
																0	0	0	0
																0	0	0	0
																0	0	0	0
																0	0	0	0
					1799	2854.7	77.3443	169.849			2932.05					1884.45	2990.3	85.3572	187.446
					1883.55		Iy total	Ix total										Iy total	Ix total
							2932.05	3024.55			7.87583		#DIV/0!					3075.66	3177.75
						K=2.3	3069.85	3166.71
Segment from acetablulum	Segment length	Distance	Frustum CM from tip of rostrum	Frustum CM from body CM
23	0.08901	5.39267	0.0910882	2.76789
22	0.11869	5.27398	0.201681	2.6573
21	0.21758	5.0564	0.326876	2.5321
20	0.21759	4.83881	0.458488	2.40049
19	0.21264	4.62617	0.590111	2.26887
18	0.21264	4.41353	0.719181	2.1398
17	0.21264	4.20089	0.850925	2.00805
16	0.21758	3.98331	0.984767	1.87421
15	0.21759	3.76572	1.12103	1.73795
14	0.2077	3.55802	1.25446	1.60452
13	0.21264	3.34538	1.38077	1.47821
12	0.21758	3.1278	1.50828	1.3507
11	0.2077	2.9201	1.65229	1.20669
10	0.21264	2.70746	1.77932	1.07966
9	0.21758	2.48988	1.90554	0.953438
8	0.2077	2.28218	2.0366	0.822379
7	0.21759	2.06459	2.17094	0.688041
6	0.21264	1.85195	2.30781	0.551168
5	0.21264	1.63931	2.44183	0.41715
4	0.21758	1.42173	2.57244	0.286543
3	0.21264	1.20909	2.70405	0.154924
2	0.21264	0.99645	2.84254	0.0164433
1	0.21759	0.77886	2.97436	0.115384
0	0.21264	0.56622	3.10193	0.242952
1	0.2077	0.35358	3.23504	0.37606
2	0.10384	0.14588	3.36355	0.504569
3	0.11374	0.05687	3.49099	0.632009
4	0	0	3.6245	0.765516
5	0.10879	0.054395	3.75647	0.897495
6	0.1088	0.163185	3.88534	1.02636
7	0.21264	0.375825	4.02201	1.16304
8	0.21264	0.588465	4.14974	1.29076
9	0.21264	0.801105	4.27808	1.4191
10	0.21264	1.01375	4.41334	1.55436
11	0.21758	1.23133	4.54269	1.68371
12	0.2077	1.43903	4.677	1.81802
13	0.21759	1.65661	4.8145	1.95552
14	0.21758	1.87419	4.94314	2.08416
15	0.21264	2.08684	5.07077	2.2118
16	0.21264	2.29947	5.20673	2.34775
17	0.2077	2.50717	5.34756	2.48858
18	0.21758	2.72475	5.47037	2.61139
19	0.21759	2.94235	5.60348	2.7445
20	0.2077	3.15004	5.7369	2.87792
21	0.21758	3.36762	5.86026	3.00128
22	0.21264	3.58027	6.00213	3.14315
23	0.2077	3.78796	6.13631	3.27733
24	0.21758	4.00555	6.26595	3.40697
25	0.21759	4.22314	6.3955	3.53652
26	0.20769	4.43083	6.52854	3.66956
27	0.21759	4.64841	6.65692	3.79794
28	0.21264	4.86106	6.79694	3.93796
29	0.21759	5.07864	6.92761	4.06863
30	0.20769	5.28634	7.05738	4.1984
31	0.21264	5.49897	7.18453	4.32556
32	0.21759	5.71657	7.32141	4.46243
33	0.21264	5.92921	7.44486	4.58589
34	0.21264	6.14184	7.57814	4.71916
35	0.21264	6.35449	7.69843	4.83945
